# Supplementary material
Source: publisher site journal article supplement (https://www.dovepress.com/article/272075)
Supplement: Supplementary file 1 [file get_supplementary_file.php]

**Appendix Table 1. Responsiveness Analysis for EQ-5D-3L VAS scores**

| <b>Anchor</b>             | <b>Point Biserial Correlations</b> | <b>Mean change in responders scores</b> | <b>SD of change in non-responders scores</b> | <b>Guyatt statistic</b> |
|---------------------------|------------------------------------|-----------------------------------------|----------------------------------------------|-------------------------|
| <b>Culture conversion</b> | 0.10                               | 5.31                                    | 19.23                                        | 0.28                    |
| <b>ppFEV<sub>1</sub></b>  | -0.03                              | -0.37                                   | 22.81                                        | -0.02                   |
| <b>6MWT</b>               | 0.19                               | 7.14                                    | 13.03                                        | 0.26                    |
| <b>SGRQ</b>               | 0.13                               | 5.84                                    | 22.77                                        | 0.26                    |

Abbreviations: 6MWT, 6-Minute Walk Test; EQ-5D-3L, EuroQol 5-dimensional 3-level; SGRQ, St. George's Respiratory Questionnaire; ppFEV<sub>1</sub>, percent predicted forced expiratory volume, VAS, visual analogue scale.

**Appendix Table 2: List of Independent Ethics Committees and Institutional Review Boards**

| <b>Site No.</b> | <b>Investigator Name</b>                                               | <b>Name/Address of Ethics Committee</b>                                                                                                                                      | <b>Name of Chairperson</b> |
|-----------------|------------------------------------------------------------------------|------------------------------------------------------------------------------------------------------------------------------------------------------------------------------|----------------------------|
| 0101            | Patrick A Flume, MD                                                    | Western IRB (WIRB)<br>1019 39th Avenue SE<br>Puyallup, WA 98374-2115 USA                                                                                                     | Kelly Fitzgerald,<br>PhD   |
| 0102            | Vince Perron, MD (Formerly<br>Tarik Haddad, MD)                        | Western IRB (WIRB)<br>1019 39th Avenue SE<br>Puyallup, WA 98374-2115 USA                                                                                                     | Kelly Fitzgerald,<br>PhD   |
| 0103            | Donald R Graham, MD                                                    | Copernicus Group IRB<br>5000 CentreGreen Way<br>Suite 200<br>Cary, NC 27513 USA                                                                                              | Glenn Veit, JD, CIP        |
| 0105            | Maria Gabriela Tupayachi<br>Ortiz, MD (Formerly Andreas<br>Schmid, MD) | University of Miami – Human<br>Subjects Research Office (HSRO)<br>1400 NW 10th Avenue<br>Suite 1200A<br>Miami, FL 33136 USA                                                  | Thomas Sick, PhD           |
| 0106            | Stephen J Ruoss, MD                                                    | Research Compliance Office,<br>Stanford University<br>3000 El Camino Real<br>Five Palo Alto Square<br>4th Floor<br>Palo Alto, CA 94306 USA                                   | David D. Oakes,<br>MD      |
| 0107            | Kevin L Winthrop, MD                                                   | OHSU – IRB<br>3181 SW Sam Jackson Park Road<br>L106-R1<br>Portland, OR 97239 USA                                                                                             | Kathryn Schuff, MD         |
| 0108            | Anne E O'Donnell, MD                                                   | Georgetown University Hospital<br>IRB<br>3900 Reservoir Road NW<br>SW 104 Medical and Dental<br>Building<br>Washington, DC 20057 USA                                         | Korin Hudson, MD           |
| 0109            | Adupa P Rao, MD<br>(Formerly Kamyar Afshar,<br>MD)                     | University of Southern CA, Health<br>Science Campus IRB<br>LAC USC Medical Center, General<br>Hospital<br>Suite 4700<br>1200 North State Street<br>Los Angeles, CA 90033 USA | Darcy V Spicer,<br>MD      |
| 0110            | Thomas W O'Brien, MD                                                   | Copernicus Group IRB<br>5000 CentreGreen Way<br>Suite 200<br>Cary, NC 27513 USA                                                                                              | Glenn Veit, JD, CIP        |

**Appendix Table 2: List of Independent Ethics Committees and Institutional Review Boards (Continued)**

| <b>Site No.</b> | <b>Investigator Name</b>            | <b>Name/Address of Ethics Committee</b>                                                                                               | <b>Name of Chairperson</b> |
|-----------------|-------------------------------------|---------------------------------------------------------------------------------------------------------------------------------------|----------------------------|
| 0111            | Ahmad Jalloul, MD, FCCP             | Copernicus Group IRB<br>5000 CentreGreen Way<br>Suite 200<br>Cary, NC 27513 USA                                                       | Glenn Veit, JD, CIP        |
| 0112            | Doreen J Addrizzo-Harris, MD        | NYU School of Medicine IRB<br>1 Park Avenue<br>6th Floor<br>New York, NY 10016 USA                                                    | Frederick More, DDS        |
| 0113            | Janak Koirala, MD, MPH, FCAP, FIDSA | Springfield Committee for Research Involving Human Subjects<br>201 E Madison Street<br>PO Box 19664<br>Springfield, IL 62794-9664 USA | Krishna Rao, MD, PhD       |
| 0114            | David E Griffith, MD                | University of Texas Health Science Center – Tyler IRB<br>11937 US Highway 271<br>Tyler, TX 75708 USA                                  | Gloria Duke, PhD           |
| 0115            | Julie A Biller, MD                  | Medical College of Wisconsin/Froedtert Hospital IRB<br>8701 Watertown Plank Road<br>Milwaukee, WI 53226 USA                           | Mary Eapen, MD, MS         |
| 0116            | Anas Hadeh, MD                      | Cleveland Clinic IRB<br>9500 Euclid Avenue<br>Cleveland, OH 44195 USA                                                                 | Alan Lichtin, MD           |
| 0117            | Wesley R Bray, MD                   | Western IRB (WIRB)<br>1019 39th Avenue SE<br>Puyallup, WA 98374-2115 USA                                                              | Kelly Fitzgerald, PhD      |
| 0118            | Kevin De Boer, DO                   | Copernicus Group IRB<br>5000 CentreGreen Way<br>Suite 200<br>Cary, NC 27513 USA                                                       | Glenn Veit, JD, CIP        |
| 0120            | Wael El Maraachli, MD               | Western IRB (WIRB)<br>1019 39th Avenue SE<br>Puyallup, WA 98374-2115 USA                                                              | Kelly Fitzgerald, PhD      |
| 0122            | Gregory J Feldman, MD               | Copernicus Group IRB<br>5000 CentreGreen Way<br>Suite 200<br>Cary, NC 27513 USA                                                       | Glenn Veit, JD, CIP        |

**Appendix Table 2: List of Independent Ethics Committees and Institutional Review Boards (Continued)**

| <b>Site No.</b> | <b>Investigator Name</b>                          | <b>Name/Address of Ethics Committee</b>                                                                                      | <b>Name of Chairperson</b>      |
|-----------------|---------------------------------------------------|------------------------------------------------------------------------------------------------------------------------------|---------------------------------|
| 0123            | Timothy R Aksamit, MD                             | Mayo Clinic IRB<br>200 First Street SW<br>Rochester, MN 55905 USA                                                            | R. Scott Wright,<br>MD          |
| 0124            | Sever Surdulescu, MD                              | Copernicus Group IRB<br>5000 CentreGreen Way<br>Suite 200<br>Cary, NC 27513 USA                                              | Glenn Veit, JD, CIP             |
| 0125            | Lee Morrow, MD                                    | Creighton University IRB<br>2500 California Plaza<br>Omaha, NE 68178 USA                                                     | Mary Kunes-<br>Connell, RN, PhD |
| 0126            | Daniel J Dorgan, MD                               | University of Pennsylvania<br>Office of Regulatory Affairs<br>3624 Market Street<br>Suite 301S<br>Philadelphia, PA 19104 USA | Name not released               |
| 0127            | Charles A Thompson, MD                            | Copernicus Group IRB<br>5000 CentreGreen Way<br>Suite 200<br>Cary, NC 27513 USA                                              | Glenn Veit, JD, CIP             |
| 0128            | Selwyn Spangenthal, MD                            | Copernicus Group IRB<br>5000 CentreGreen Way<br>Suite 200<br>Cary, NC 27513 USA                                              | Glenn Veit, JD, CIP             |
| 0129            | Khalid Rao, MD<br>(Formerly Michael Basha,<br>DO) | Copernicus Group IRB<br>5000 CentreGreen Way<br>Suite 200<br>Cary, NC 27513 USA                                              | Glenn Veit, JD, CIP             |
| 0130            | Dennis R Bassetti, MD                             | Copernicus Group IRB<br>5000 CentreGreen Way<br>Suite 200<br>Cary, NC 27513 USA                                              | Glenn Veit, JD, CIP             |
| 0131            | Fred C Umeh, MD                                   | Copernicus Group IRB<br>5000 CentreGreen Way<br>Suite 200<br>Cary, NC 27513 USA                                              | Glenn Veit, JD, CIP             |
| 0135            | Jeffrey M Dorf, MD                                | Copernicus Group IRB<br>5000 CentreGreen Way<br>Suite 200<br>Cary, NC 27513 USA                                              | Glenn Veit, JD, CIP             |

**Appendix Table 2: List of Independent Ethics Committees and Institutional Review Boards (Continued)**

| <b>Site No.</b> | <b>Investigator Name</b>                                                           | <b>Name/Address of Ethics Committee</b>                                                          | <b>Name of Chairperson</b>          |
|-----------------|------------------------------------------------------------------------------------|--------------------------------------------------------------------------------------------------|-------------------------------------|
| 0137            | Philip T Diaz, MD                                                                  | Western IRB (WIRB)<br>1019 39th Avenue SE<br>Puyallup, WA 98374-2115 USA                         | Kelly Fitzgerald,<br>PhD            |
| 0139            | Jonathan S Ilowite, MD                                                             | Western IRB (WIRB)<br>1019 39th Avenue SE<br>Puyallup, WA 98374-2115 USA                         | Kelly Fitzgerald,<br>PhD            |
| 0140            | Mark T Pollock, MD                                                                 | Copernicus Group IRB<br>5000 CentreGreen Way<br>Suite 200<br>Cary, NC 27513 USA                  | Glenn Veit, JD, CIP                 |
| 0141            | Juzar Ali, MD<br>(Formerly Carol M Mason,<br>MD)                                   | LSU Health Sciences Center New<br>Orleans IRB<br>433 Bolivar Street<br>New Orleans, LA 70112 USA | Kenneth E Kratz,<br>PhD             |
| 0142            | Ivan F Ackerman, MD                                                                | Western IRB (WIRB)<br>1019 39th Avenue SE<br>Puyallup, WA 98374-2115 USA                         | Kelly Fitzgerald,<br>PhD            |
| 0143            | Francis J Averill, MD, JD                                                          | Copernicus Group IRB<br>5000 CentreGreen Way<br>Suite 200<br>Cary, NC 27513 USA                  | Glenn Veit, JD, CIP                 |
| 0145            | Lilibeth A Pineda, MD, FCCP                                                        | Carl T Hayden IRB<br>650 E Indian School Road<br>Phoenix, AZ 85012 USA                           | Sherman Mitchell<br>Harman, MD, PhD |
| 0147            | Elliott C Dasenbrook, MD                                                           | Cleveland Clinic IRB<br>9500 Euclid Avenue<br>Cleveland, OH 44195 USA                            | Alan Lichtin, MD                    |
| 0148            | Louise A Taber, MS, RD, MD,<br>FACP, CPI (Formerly Stephen<br>N Finberg, DO, FCCP) | Copernicus Group IRB<br>5000 CentreGreen Way<br>Suite 200<br>Cary, NC 27513 USA                  | Glenn Veit, JD, CIP                 |
| 0149            | Sigfredo Aldarondo, MD                                                             | Copernicus Group IRB<br>5000 CentreGreen Way<br>Suite 200<br>Cary, NC 27513 USA                  | Glenn Veit, JD, CIP                 |
| 0151            | Godson Oguchi, MD                                                                  | Copernicus Group IRB<br>5000 CentreGreen Way<br>Suite 200<br>Cary, NC 27513 USA                  | Glenn Veit, JD, CIP                 |

**Appendix Table 2: List of Independent Ethics Committees and Institutional Review Boards (Continued)**

| <b>Site No.</b> | <b>Investigator Name</b>  | <b>Name/Address of Ethics Committee</b>                                                                                         | <b>Name of Chairperson</b>   |
|-----------------|---------------------------|---------------------------------------------------------------------------------------------------------------------------------|------------------------------|
| 0153            | Mehdi Mirsaeidi, MD       | Human Studies Subcommittee IRB<br>1201 Northwest 16 <sup>th</sup> Street<br>Miami, FL 33125-1693 USA                            | Leonardo Tamariz,<br>MD, MPH |
| 0155            | Barry W Sigal, MD         | Copernicus Group IRB<br>5000 CentreGreen Way<br>Suite 200<br>Cary, NC 27513 USA                                                 | Glenn Veit, JD, CIP          |
| 0161            | Angela DiMango, MD        | Columbia University Medical<br>Center IRB<br>154 Haven Avenue<br>1st Floor<br>New York, NY 10032 USA                            | Neil Schluger, MD            |
| 0163            | Chris Landon, MD          | Copernicus Group IRB<br>5000 CentreGreen Way<br>Suite 200<br>Cary, NC 27513 USA                                                 | Glenn Veit, JD, CIP          |
| 0166            | Douglas Brent McQuaid, MD | Cone Health IRB<br>1200 North Elm Street<br>Greensboro, NC 27401 USA                                                            | Charles Wilson, MD           |
| 0168            | Louis R Depalo, MD        | Western IRB (WIRB)<br>1019 39th Avenue SE<br>Puyallup, WA 98374-2115 USA                                                        | Kelly Fitzgerald,<br>PhD     |
| 0169            | Jorge Lascano, MD         | Western IRB (WIRB)<br>1019 39th Avenue SE<br>Puyallup, WA 98374-2115 USA                                                        | Kelly Fitzgerald,<br>PhD     |
| 0174            | Brian M Morrissey, MD     | UC Davis Medical Center IRB<br>2921 Stockton Boulevard<br>Suite 1400, Room 1429<br>Sacramento, CA 95817 USA                     | John Anderson, MD            |
| 0175            | Timothy M Evans, MD       | Community Medical Centers IRB<br>155 N Fresno Street 290<br>Fresno, CA 93701 USA                                                | Robert Libke, MD             |
| 0178            | Suzanne Templer, DO       | Lehigh Valley Health Network IRB<br>Research Participant Protection<br>Office<br>707 Hamilton Street<br>Allentown, PA 18101 USA | Leroy Kromis,<br>PharmD      |

**Appendix Table 2: List of Independent Ethics Committees and Institutional Review Boards (Continued)**

| Site No. | Investigator Name                  | Name/Address of Ethics Committee                                                                                                                                 | Name of Chairperson                   |
|----------|------------------------------------|------------------------------------------------------------------------------------------------------------------------------------------------------------------|---------------------------------------|
| 0184     | Johnnie Woodson Jr, MD             | Copernicus Group IRB<br>5000 CentreGreen Way<br>Suite 200<br>Cary, NC 27513 USA                                                                                  | Glenn Veit, JD, CIP                   |
| 0301     | J Douglass Rolf, MD                | Western IRB (WIRB)<br>1019 39th Avenue SE<br>Puyallup, WA 98374-2115 USA                                                                                         | Lucille Broberg, MD                   |
| 0302     | Theodore C Marras, MD, MSc, FRCPE  | University Health Network<br>Research Ethics Board<br>700 University Avenue<br>10th Floor-1056<br>Toronto, ON M5G 1Z5 Canada                                     | Alan Barolet, MD                      |
| 0303     | Stephen K Field, MD                | Conjoint Health Research Ethics Board<br>University of Calgary 2500<br>University Drive NW<br>Calgary, AB T2N 1N4 Canada                                         | Stacey A Page, PhD                    |
| 0304     | Anil Dhar, MD, MB, BS, FRCPC, FCCP | Western IRB (WIRB)<br>1019 39th Avenue SE<br>Puyallup, WA 98374-2115 USA                                                                                         | Lucille Broberg, MD                   |
| 0305     | Sylvie Trottier, MD, MSc, FRCPC    | Comite d'éthique de la recherche de l'Institut universitaire de cardiologie et de pneumonologie de Québec<br>2725 Chemin Sainte-Foy<br>Quebec, QC G1V 4G5 Canada | Franck Molin, MD                      |
| 0308     | Martha Ainslie, MD                 | University of Manitoba Bannatyne Campus, Biomedical Ethics Board<br>P126-770 Bannatyne Avenue<br>Winnipeg, MB R3E 0W3 Canada                                     | Lindsay Nicolle, MD                   |
| 0401     | Benjamin A Rogers, MD, MBBS, FRACP | Metro South Human Research Ethics Committee<br>Level 7, Translational Research Institute<br>37 Kent Street<br>Woolloongabba, QLD 4102<br>Australia               | Assistant Professor<br>Scott Campbell |

**Appendix Table 2: List of Independent Ethics Committees and Institutional Review Boards (Continued)**

| <b>Site No.</b> | <b>Investigator Name</b>              | <b>Name/Address of Ethics Committee</b>                                                                                                                                               | <b>Name of Chairperson</b>         |
|-----------------|---------------------------------------|---------------------------------------------------------------------------------------------------------------------------------------------------------------------------------------|------------------------------------|
| 0402            | Rachel Thomson, MD                    | Greenslopes Research and Ethics Committee<br>Greenslopes Private Hospital<br>Newdegate Street<br>Greenslopes, QLD 4120 Australia                                                      | Professor Darrell Crawford         |
| 0404            | Andrew J Burke, MD, MBBS, DTMH, FRACP | Metro South Human Research Ethics Committee<br>Level 7, Translational Research Institute<br>37 Kent Street<br>Woolloongabba, QLD 4102 Australia                                       | Assistant Professor Scott Campbell |
| 0405            | Simon D Bowler, MD                    | Belberry Human Research Ethics Committee<br>129 Glen Osmond Road<br>Eastwood, SA 5063 Australia                                                                                       | Assistant Professor Brian Stoffell |
| 0406            | Frederick Graham Simpson, MD          | Metro South Human Research Ethics Committee<br>Level 7, Translation Research Institute<br>37 Kent Street<br>Woolloongabba, QLD 4102 Australia                                         | Assistant Professor Scott Campbell |
| 0407            | Geoffrey W Eather, MD                 | Metro South Human Research Ethics Committee<br>Level 7, Translational Research Institute<br>37 Kent Street<br>Woolloongabba, QLD 4102 Australia                                       | Assistant Professor Scott Campbell |
| 0408            | Lucy C Morgan, MD                     | Metro South Hospital and Health Service<br>Centres for Health Research,<br>Level 7, TR1 Building<br>Princess Alexandra Hospital,<br>Ipswich Road<br>Woolloongabba, QLD 4102 Australia | Assistant Professor Scott Campbell |



**Appendix Table 2: List of Independent Ethics Committees and Institutional Review Boards (Continued)**

| <b>Site No.</b> | <b>Investigator Name</b>                                                        | <b>Name/Address of Ethics Committee</b>                                                                                                            | <b>Name of Chairperson</b>         |
|-----------------|---------------------------------------------------------------------------------|----------------------------------------------------------------------------------------------------------------------------------------------------|------------------------------------|
| 0409            | Pathmanathan (Siva) Sivakumaran, MD                                             | Metro South Human Research Ethics Committee<br>Level 7, Translational Research Institute<br>37 Kent Street<br>Woolloongabba, QLD 4102<br>Australia | Assistant Professor Scott Campbell |
| 0410            | Richard A Stapledon, MD                                                         | Metro South Human Research Ethics Committee<br>Level 7, Translational Research Institute<br>37 Kent Street<br>Woolloongabba, QLD 4102<br>Australia | Assistant Professor Scott Campbell |
| 0411            | Andrew Jones, MD                                                                | Metro South Human Research Ethics Committee<br>Level 7, Translational Research Institute<br>37 Kent Street<br>Woolloongabba, QLD 4102<br>Australia | Assistant Professor Scott Campbell |
| 0501            | James M Taylor, MD (Formerly Amanda McNaughton, MD)                             | Health and Disability Ethics Committee<br>Ministry of Health, Ethics Department<br>20 Aitken Street<br>Thorndon, Wellington 6011 New Zealand       | Brian Fergus, MD                   |
| 0502            | Lutz EL Beckert, MD                                                             | Health and Disability Ethics Committee<br>Ministry of Health, Ethics Department<br>20 Aitken Street<br>Thorndon, Wellington 6011 New Zealand       | Brian Fergus, MD                   |
| 0601            | Bernd Lamprecht, Piv. Doz. Prim. Dr. National Coordinating Investigator Austria | Ethikkommission des Landes Oberösterreich<br>Wagner-Jauregg Weg 15<br>Linz OOE 4020 Austria                                                        | Univ. – Prof. Dr. J. Fischer       |

**Appendix Table 2: List of Independent Ethics Committees and Institutional Review Boards (Continued)**

| Site No. | Investigator Name                                                               | Name/Address of Ethics Committee                                                                                                    | Name of Chairperson         |
|----------|---------------------------------------------------------------------------------|-------------------------------------------------------------------------------------------------------------------------------------|-----------------------------|
| 0701     | Prof. Dr. med Dirk Wagner<br>National Coordinating Investigator Germany         | Albert-Ludwigs-Universität Freiburg<br>Ethik-Kommission<br>Engelberger Str. 21<br>79106 Freiburg, Germany                           | Prof. Dr. S. Pollack        |
| 0702     | Christian Herzmann, MD                                                          |                                                                                                                                     |                             |
| 0703     | Rainald Fischer, MD                                                             |                                                                                                                                     |                             |
| 0704     | Felix C Ringshausen, MD                                                         |                                                                                                                                     |                             |
| 0708     | Korkut Avsar, MD                                                                |                                                                                                                                     |                             |
| 0804     | Charles Haworth, MD, FRCP<br>National Coordinating Investigator UK              | NHS<br>East of England – Cambridge East REC<br>The Old Chapel Royal Standard Court<br>Nottingham, England NG1 6FS<br>United Kingdom | Leslie Gelling, MD          |
| 0803     | Dennis Wat, MD<br>(Formerly Derek J Sloane, MD)                                 |                                                                                                                                     |                             |
| 0805     | Michael R Loebinger, MD                                                         |                                                                                                                                     |                             |
| 0806     | Imran Aziz, MD                                                                  |                                                                                                                                     |                             |
| 0809     | Monica E Nordstrom, MD                                                          |                                                                                                                                     |                             |
| 0810     | Alec Bonington, MD                                                              |                                                                                                                                     |                             |
| 0811     | Irfan Wahedna, MD                                                               |                                                                                                                                     |                             |
| 0812     | David D Derry, MD                                                               |                                                                                                                                     |                             |
| 0814     | Adam Hill, MD                                                                   |                                                                                                                                     |                             |
| 0815     | Mark Wilkinson, MD                                                              |                                                                                                                                     |                             |
| 0816     | Olugbenga A Afolabi, MD                                                         |                                                                                                                                     |                             |
| 0817     | Eavan Muldoon, MD                                                               |                                                                                                                                     |                             |
| 0901     | Wouter Hoefsloot, MD, PhD<br>National Coordinating Investigator The Netherlands | CMO region Arnhem-Nijmegen<br>Geert Grooteplein 10<br>Postbus 9101, Huispost 628<br>Nijmegen 6500 HB Netherlands                    | Prof. dr. P.N.R. Dekhuijzen |
| 1001     | Luigi Codecasa, MD<br>National Coordinating Investigator Italy                  | Comitato Etico Milano Area C<br>Piazza Ospedale Maggiore 3<br>Milan 20162 Italy                                                     | Prof Bruno Mario Cesana, MD |
| 1002     | Giuseppe Lapadula, MD                                                           | Comitato Etico della Provincia<br>Monza e Brianza<br>Via Pergolesi 33<br>Monza MB 20900 Italy                                       | Prof Vittorio Locatelli, MD |

**Appendix Table 2: List of Independent Ethics Committees and Institutional Review Boards (Continued)**

| Site No. | Investigator Name                                                                   | Name/Address of Ethics Committee                                                                                              | Name of Chairperson         |
|----------|-------------------------------------------------------------------------------------|-------------------------------------------------------------------------------------------------------------------------------|-----------------------------|
| 1008     | Prof Pierluigi Viale, MD                                                            | Comitato Etico Azienda Ospedaliero Universitaria de Bologna<br>Via Albertoni 15<br>Bologna 40138 Italy                        | Nicola Montanaro            |
| 1009     | Prof Pierluigi Paggiaro, MD                                                         | Comitato Etico Milano Area C<br>Piazza Ospedale Maggiore 3<br>Milan 20162 Italy                                               | Prof Bruno Mario Cesana, MD |
| 1010     | Riccardo Pela, MD                                                                   | Comitato Etico Regione Marche<br>Via Caduti de Lavoro 40<br>Ancona 60131 Italy                                                | Prof Paolo Pelaia, MD       |
| 1011     | Pier Giorgio Rogasi, MD                                                             | Comitato Etico Milano Area C<br>Piazza Ospedale Maggiore 3<br>Milan 20162 Italy                                               | Prof Bruno Mario Cesana, MD |
| 1101     | Professor Claire Andrejak<br>National Coordinating Investigator France              | CPP Nord Ouest II<br>CHU d' Amiens<br>Batiment Pharmacie – 1er etage –<br>place Victor Pauchet<br>Amiens Cedex 1 80054 France | Dr. Pierre Bou              |
| 1102     | Nicolas Veziris, MD, PhD                                                            |                                                                                                                               |                             |
| 1103     | Laurence Bassinet, MD                                                               |                                                                                                                               |                             |
| 1104     | Francois-Xavier Blanc, MD, PhD                                                      |                                                                                                                               |                             |
| 1105     | Francis Couturaud, MD                                                               |                                                                                                                               |                             |
| 1106     | Emilie Catherinot, MD                                                               |                                                                                                                               |                             |
| 1201     | Jordi Dorca Sargatal, MD                                                            | CEIC Hospital Bellvitge<br>Feixa Larga s/n Planta 16<br>L'Hospitalet de Llobregat<br>Barcelona 08907 Spain                    | Francesc Esteve Urbano, MD  |
| 1202     | Felipe Villar Alvarez, MD                                                           |                                                                                                                               |                             |
| 1204     | Jesus Fortun Abete, MD                                                              |                                                                                                                               |                             |
| 1303     | Janusz Milanowski, MD, PhD<br>(Habil.)<br>National Coordinating Investigator Poland | Komisja Bioetyczna przy Okregowej Izbie Lekarskiej w Lublinie<br>ul. Chmielna 4<br>Lublin 20-079 Poland                       | Janusz Dubejko, MD, PhD     |
| 1301     | Krzysztof Sladek, MD, PhD                                                           |                                                                                                                               |                             |
| 1302     | Mirosława Pazdzierz, MD                                                             |                                                                                                                               |                             |

**Appendix Table 2: List of Independent Ethics Committees and Institutional Review Boards (Continued)**

| Site No. | Investigator Name               | Name/Address of Ethics Committee                                                                                                              | Name of Chairperson               |
|----------|---------------------------------|-----------------------------------------------------------------------------------------------------------------------------------------------|-----------------------------------|
| 1401     | Takefumi Saito, MD, PhD         | National Hospital Organization<br>Ibaraki Higashi National Hospital<br>IRB<br>825 Terunuma, Nakagun Tokai-<br>mura<br>Ibaraki, Japan 319-1113 | Kenji Hayashihara,<br>MD          |
| 1402     | Naoki Hasegawa, MD, PhD         | Keio University Hospital IRB<br>35 Shinanomachi, Shinjuku-ku<br>Tokyo, Japan 160-8582                                                         | Daisuke Aoki, MD,<br>PhD          |
| 1403     | Jin Takasaki, MD                | Center Hospital of the National<br>Center for Global Health and<br>Medicine IRB<br>1-21-1, Toyama Shinjuku-ku<br>Tokyo, Japan 162-8655        | Takeshi Tamaki,<br>MD, PhD        |
| 1404     | Kozo Morimoto, MD, PhD          | Japan Anti-Tuberculosis<br>Association, Fukujuji Hospital IRB<br>3-1-24 Matsuyama, Kiyose<br>Tokyo, Japan 204-8522                            | Kozo Morimoto,<br>MD, PhD         |
| 1405     | Yoshitaka Yamazaki, MD,<br>PhD  | Review Board of Human Rights and<br>Ethics for Clinical Studies IRB<br>13-2 Ichiban-cho<br>Chiyoda-ku Tokyo, Japan 102-0082                   | Norihiko Basugi,<br>MD, PhD       |
| 1406     | Taku Nakagawa, MD, PhD          | National Hospital Organization<br>Higashi Nagoya National Hospital<br>IRB<br>5-101 Umemorizaka, Meito-ku<br>Nagoya-shi Aichi, Japan 465-8620  | Kenji Ogawa, MD,<br>PhD           |
| 1407     | Kazunari Tsuyuguchi, MD,<br>PhD | National Hospital Organization<br>Kinki-Chuo Chest Medical Center<br>IRB<br>1180 Nagasone-cho, Kita-ku<br>Sakai Osaka, Japan 591-8555         | Akihide Matsumura,<br>MD, PhD     |
| 1408     | Seigo Kitada, MD, PhD           | National Hospital Organization<br>Toneyama National Hospital IRB<br>5-1-1 Toneyama<br>Toyonaka Osaka, Japan 560-8552                          | Tsuyoshi<br>Matsumura, MD,<br>PhD |
| 1501     | Mordechai Kramer, PhD           | Rabin Medical Center IRB<br>39 Jabotinsky Street<br>Tikva 49100 Israel                                                                        | Prof Meir Lahav,<br>MD            |

**Appendix Table 2: List of Independent Ethics Committees and Institutional Review Boards (Continued)**

| Site No. | Investigator Name           | Name/Address of Ethics Committee                                                                                                                                                                                   | Name of Chairperson                  |
|----------|-----------------------------|--------------------------------------------------------------------------------------------------------------------------------------------------------------------------------------------------------------------|--------------------------------------|
| 1502     | Yochai Adir, MD             | Helsinki Committee Carmel Medical Centre<br>7 Michal Street<br>Haifa 3436212 Israel                                                                                                                                | Prof Eitan Shiloni, MD               |
| 1507     | Galia Rahav, MD             | Sheba Medical Center IRB<br>Tel Hashomer<br>Ramat Gan 52621 Israel                                                                                                                                                 | Prof. Ruth Hardoff                   |
| 1508     | Yael Raviv, MD              | Soroka Medical Center IRB<br>Pulmonary Institute<br>PO Box 151<br>Beer Sheva 84101 Israel                                                                                                                          | Prof Reli Hershkovitz                |
| 1601     | Chung-Yu Chen, MD           | Research Ethics Committee<br>National Taiwan University<br>Hospital<br>No. 7 Chung-Shan South Road<br>Taipei 100 Taiwan                                                                                            | Daniel Fu-Chang Tsai, MD             |
| 1702     | Prapaporn Pornsuriyasak, MD | Ethical Clearance Committee on Human Rights Related to Research Involving Human Subjects Faculty of Medicine Ramathibodi Hospital, Mahidol University<br>270 Rama VI Road<br>Ratchathewi<br>Bangkok 10400 Thailand | Asst Prof Chusak Okascharoen, MD     |
| 1703     | Charoen Chuchottaworn, MD   | Central Research Ethics Committee (CREC)<br>National Research Council of Thailand<br>196 Moo 5 Phaholyothin Road<br>Lat Yao<br>Jatujak Bangkok 10900 Thailand                                                      | Assoc Prof Aphornpirom Ketupanya, MD |
| 1708     | Nasikarn Angkasekwina, MD   | Siriraj Hospital, Mahidol University<br>IRB<br>2 Wanglang Road<br>Siriraj, Bangkoknoi<br>Room 210, 2nd Floor, SiMR Building<br>Bangkok 10700 Thailand                                                              | Prof Chairat Shayakul, MD            |

**Appendix Table 2: List of Independent Ethics Committees and Institutional Review Boards (Continued)**

| Site No. | Investigator Name                                                     | Name/Address of Ethics Committee                                                                           | Name of Chairperson        |
|----------|-----------------------------------------------------------------------|------------------------------------------------------------------------------------------------------------|----------------------------|
| 1801     | Jae-Joon Yim, MD                                                      | Seoul National University Hospital<br>IRB<br>101 Daehak-ro<br>Jongno-gu, Seoul 03080<br>South Korea        | Byung Joo Park,<br>MD, PhD |
| 1804     | Jae Chol Choi, MD                                                     | Chung-Ang University Hospital<br>IRB<br>102 Heukseok-ro<br>Dongjak-gu, Seoul 06973<br>South Korea          | Mi-Kyung Lee,<br>MD, PhD   |
| 1805     | Tae Sun Shim, MD                                                      | Asan Medical Center IRB<br>88 Olympic-ro 43 gil<br>Songpa-gu, Seoul 05505<br>South Korea                   | Moo-Song Lee,<br>MD, PhD   |
| 1806     | Hong-Joon Shin, MD<br>(Formerly Yong-Soo Kwon,<br>MD)                 | Chonnam National University<br>Hospital IRB<br><br>42 Jebongro-ro<br>Dong-gu, Gwangju 61469 South<br>Korea | Sung Yeul Yang,<br>MD      |
| 1902     | Ronny Öehman, MD, PhD<br>National Coordinating<br>Investigator Sweden | Regionala Etikprövningsnämnden I<br>Lund<br>Box 133 Sandgatan 1<br>Lund 22100 Sweden                       | Anna Tansjö                |
| 1903     | Mats Hemlin, MD                                                       |                                                                                                            |                            |

**Appendix Figure 1. Cumulative distribution function for EQ-5D-3L index scores and (A) conversion status, (B) ppFEV<sub>1</sub>, (C) SGRQ, and (D) 6MWT.**

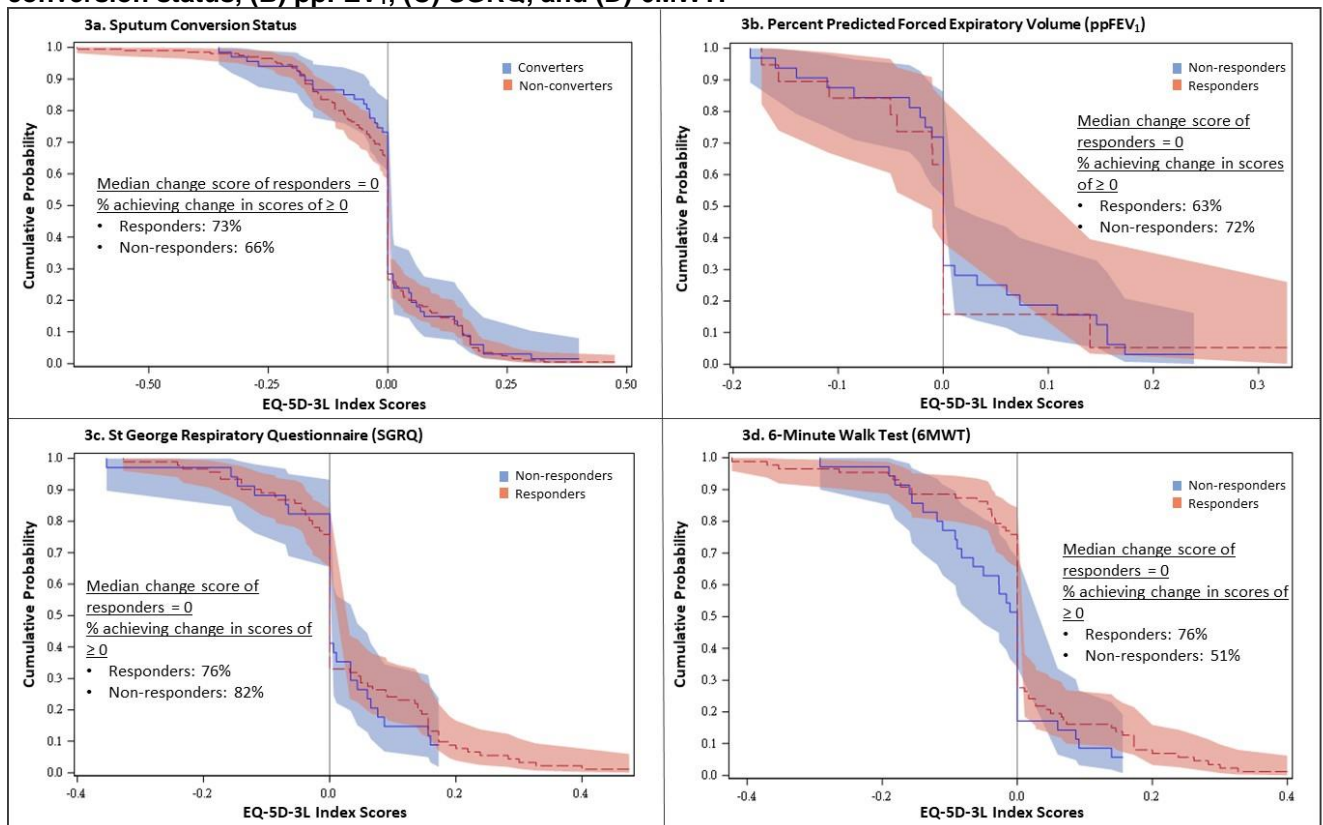

Abbreviations: 6MWT, 6-Minute Walk Test; EQ-5D-3L, EuroQol 5-dimensional 3-level; ppFEV<sub>1</sub>, percent predicted forced expiratory volume in one second; SGRQ, St. George's Respiratory Questionnaire

**Appendix Figure 2. Cumulative distribution function for EQ-5D-3L VAS scores and (A) conversion status, (B) ppFEV<sub>1</sub>, (C) SGRQ, and (D) 6MWT.**

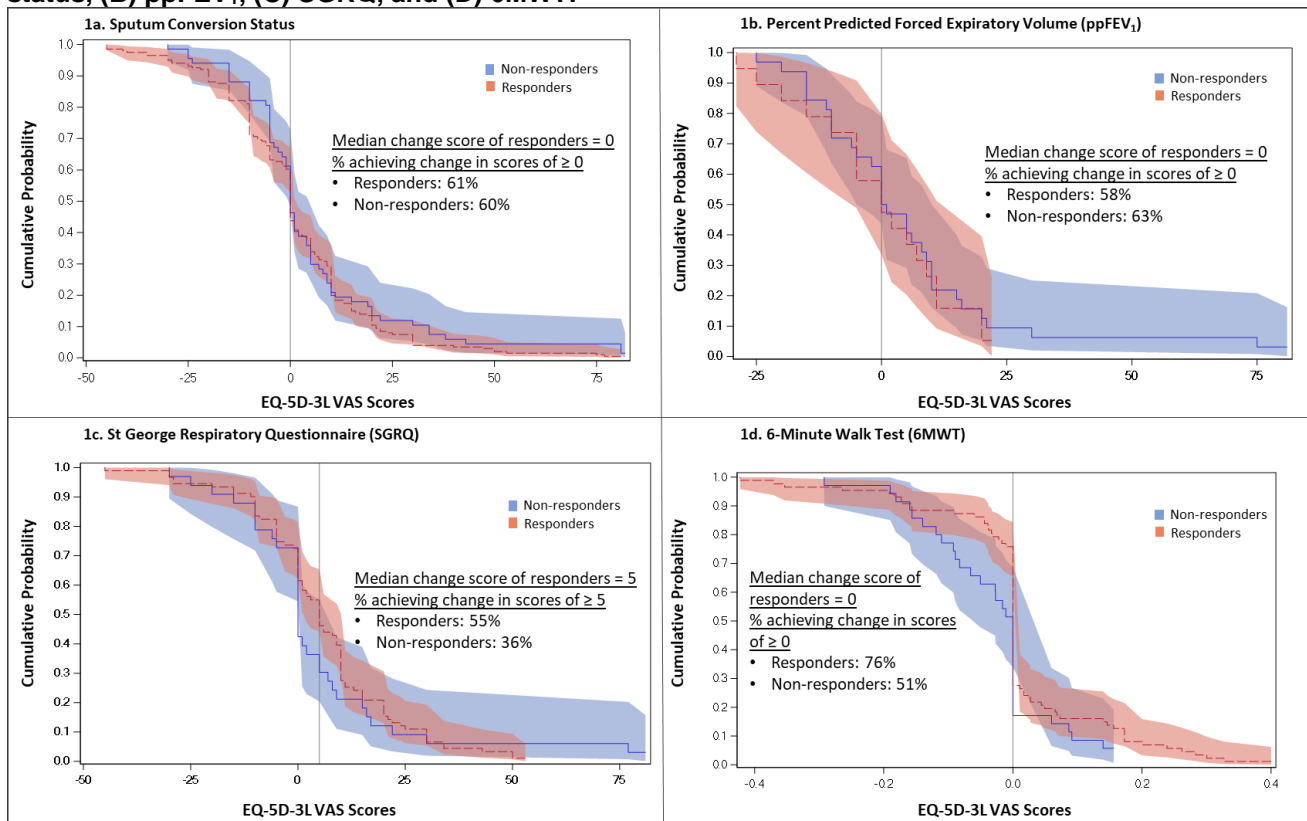

Abbreviations: 6MWT, 6-Minute Walk Test; EQ-5D-3L, EuroQol 5-dimensional 3-level; ppFEV<sub>1</sub>, percent predicted forced expiratory volume in one second; SGRQ, St. George's Respiratory Questionnaire; VAS, visual analogue scale
